# Supplementary material for: Genome-Wide Association Study of Seed Morphology-Related TRAITS in Sorghum Mini Core and Senegalese Lines
Source: Preprints.org preprint supplement (doi:10.20944/preprints202402.1209.v1), 2024-02-21
Supplement: Supplementary file 1 [file Table S1.xlsx]

## Sheet: GAPIT.Association.Filter_GWAS_r
Table S1. SNPs significantly associated with traits of interest identified through GWAS
Trait	SNP.Name	Chr	Pos	P.value
Area_size	S1_5134167	1	5134167	1.29619e-07
	S1_5134207	1	5134207	1.29619e-07
	S1_5134221	1	5134221	1.29619e-07
	S1_5134224	1	5134224	1.29619e-07
	S1_6543997	1	6543997	2.18754e-16
	S2_41006679	2	41006679	2.65164e-18
	S2_47000446	2	47000446	2.59686e-11
	S4_48385710	4	48385710	2.67817e-07
	S5_19615525	5	19615525	1.57671e-08
	S6_23059201	6	23059201	1.03379e-08
	S7_2071138	7	2071138	3.4855e-08
	S8_5781719	8	5781719	2.43865e-16
	S8_55536348	8	55536348	1.54754e-08
Perimeter_length	S1_4380140	1	4380140	7.07966e-11
	S1_75660661	1	75660661	1.75392e-11
	S2_18369767	2	18369767	3.21814e-08
	S2_70991148	2	70991148	2.26822e-08
	S4_48385710	4	48385710	5.02513e-08
	S5_63909945	5	63909945	7.36056e-08
	S6_27511362	6	27511362	2.72417e-08
	S6_42251376	6	42251376	6.51909e-08
	S8_5781719	8	5781719	1.18532e-14
Length	S1_71932900	1	71932900	3.18948e-08
	S4_3906951	4	3906951	3.0648e-09
	S5_5040533	5	5040533	1.1396e-07
	S5_63909945	5	63909945	2.85274e-08
	S6_52777719	6	52777719	5.53848e-09
	S7_17760525	7	17760525	1.90676e-08
	S8_37366036	8	37366036	6.88413e-10
Width	S1_6054344	1	6054344	2.30863e-13
	S1_77356060	1	77356060	8.17274e-15
	S3_39868263	3	39868263	1.44934e-08
	S6_47697863	6	47697863	3.29376e-09
	S6_53299174	6	53299174	1.1719e-10
	S6_58149976	6	58149976	7.11084e-09
	S7_2071201	7	2071201	2.01697e-07
	S7_46249062	7	46249062	5.99255e-09
	S8_2664486	8	2664486	5.13525e-10
	S9_55118942	9	55118942	7.55941e-16
Length_to_width_Ratio	S2_5253885	2	5253885	2.51376e-12
	S2_18307240	2	18307240	5.77888e-10
	S2_19488887	2	19488887	1.29673e-08
	S2_63707682	2	63707682	5.44008e-08
	S2_71933499	2	71933499	4.47819e-18
	S6_39929198	6	39929198	4.11257e-10
	S6_46818908	6	46818908	2.11096e-08
	S7_59807465	7	59807465	8.53655e-35
Circularity	S1_2380714	1	2380714	3.81604e-09
	S1_78014362	1	78014362	3.83286e-11
	S3_5866775	3	5866775	8.62857e-11
	S4_6244171	4	6244171	1.00813e-12
	S5_5041030	5	5041030	8.81034e-08
	S5_67620275	5	67620275	1.27294e-07
	S8_25845405	8	25845405	8.62239e-15
	S10_36867046	10	36867046	1.72596e-07
	S10_60579567	10	60579567	1.55419e-08
Distance_between_IS_and_CG	S1_9038904	1	9038904	1.05578e-10
	S2_57495669	2	57495669	2.01672e-09
	S3_26437219	3	26437219	6.90861e-10
	S6_60560878	6	60560878	1.65822e-07
	S8_60047886	8	60047886	1.45625e-09
Brightness	S2_71878037	2	71878037	4.06765e-12
	S3_65835810	3	65835810	1.5771e-07
	S6_15379645	6	15379645	3.43778e-14
	S6_57612710	6	57612710	1.03098e-07
	S7_13824675	7	13824675	6.15127e-10
	S8_3048619	8	3048619	3.35339e-13
	S10_18564130	10	18564130	2.30777e-08
