# Supplementary material for: Genome-Wide Association Study of Seed Morphology-Related TRAITS in Sorghum Mini Core and Senegalese Lines
Source: Preprints.org preprint supplement (doi:10.20944/preprints202402.1209.v1), 2024-02-21
Supplement: Supplementary file 2 [file Table S2.xlsx]

## Sheet: candidate_genes
Table S2. List of candidate genes associated with traits of interest
Trait	Candidate genomic region (Chr:start:end)	Genbank Acc#	Gene	Description	Genomic coordinate (Chr:start-end)
Area_size	1:5129776:5153270	XP_002463789.1	LOC8084149	zinc transporter ZTP29	1:5130527-5134291
	1:6533997:6553997	XP_002466426.2	LOC8086217	UDP-glycosyltransferase 83A1	1:6529315-6535441
		XP_021316065.1	LOC8086219	uncharacterized protein LOC8086219	1:6536880-6545048
		XP_021301984.1	LOC110429773	UDP-glycosyltransferase 83A1-like	1:6546797-6547944
	2:46909052:47000446	XP_002462114.1	LOC8063481	uncharacterized protein LOC8063481	2:46930033-46931535
		XP_021309157.1	LOC8062049	obtusifoliol 14-alpha demethylase	2:46938567-46940991
		XP_021307796.1	LOC8062051	uncharacterized protein LOC8062051	2:46999353-47005042
	4:48382402:48403853	XP_002453876.1	LOC8059571	leucine aminopeptidase 2, chloroplastic	4:48383373-48386887
		XP_021316130.1	LOC110435088	uncharacterized protein LOC110435088	4:48395250-48400446
	7:2061138:2081138	XP_002443786.1	LOC8066119	COP9 signalosome complex subunit 3 isoform X1	7:2065009-2068410
		XP_021321207.1	LOC110437183	uncharacterized protein LOC110437183	7:2076964-2078013
	8:5758743:5781871	XP_021321624.1	LOC8076292	uncharacterized protein LOC8076292	8:5769227-5771374
		XP_002442907.1	LOC8076293	transmembrane 9 superfamily member 1	8:5776921-5781898
	8:55526348:55546348	XP_002442323.1	LOC8068838	ocs element-binding factor 1	8:55531822-55532295
		XP_002443358.1	LOC8067455	cytochrome c oxidase subunit 5C	8:55533566-55533757
		XP_021302244.1	LOC110429872	protein OS-9 homolog	8:55539323-55541617
Perimeter_length	1:4370140:4390140	XP_002463744.2	LOC8081261	BI1-like protein	1:4370159-4372491
		XP_002466301.1	LOC8061175	PITH domain-containing protein At3g04780	1:4381043-4384342
	1:75650661:75670661	XP_021306648.1	LOC8082030	omega-amidase, chloroplastic	1:75652998-75656585
		XP_002468411.1	LOC8059798	solute carrier family 25 member 44	1:75662619-75663626
	2:70981148:71001148	XP_002463048.1	LOC8081770	polygalacturonase inhibitor 1	2:70990488-70991489
		XP_002463049.1	LOC8056359	uncharacterized protein LOC8056359	2:70996011-70997760
	4:48382402:48403853	XP_002453876.1	LOC8059571	leucine aminopeptidase 2, chloroplastic	4:48383373-48386887
		XP_021316130.1	LOC110435088	uncharacterized protein LOC110435088	4:48395250-48400446
	5:63899945:63919945	XP_002451006.1	LOC8071962	T-complex protein 1 subunit theta isoform X2	5:63897738-63901878
		XP_021317796.1	LOC110435990	atherin-like	5:63905292-63905858
		XP_021316683.1	LOC8071963	laccase-21	5:63911487-63913435
	6:42241376:42261376	XP_002446385.1	LOC8075244	BOI-related E3 ubiquitin-protein ligase 1	6:42256360-42257548
	8:5758743:5781871	XP_021321624.1	LOC8076292	uncharacterized protein LOC8076292	8:5769227-5771374
		XP_002442907.1	LOC8076293	transmembrane 9 superfamily member 1	8:5776921-5781898
Length	1:71922900:71942900	XP_021305544.1	LOC110431154	bZIP transcription factor 16-like	1:71922367-71927230
		XP_002465579.1	LOC8078868	zinc finger protein 4	1:71931906-71932595
		XP_002468196.1	LOC8056824	protein OBERON 3	1:71934198-71937564
	4:3896951:3916951	XP_002451576.1	LOC8074663	probable leucine-rich repeat receptor-like protein kinase At1g35710	4:3904299-3906656
		XP_002453340.2	LOC8074664	opioid growth factor receptor	4:3909703-3911225
	5:5030533:5050533	XP_002449055.2	LOC8073626	UPF0481 protein At3g47200	5:5037242-5041417
	5:63899945:63919945	XP_002451006.1	LOC8071962	T-complex protein 1 subunit theta isoform X2	5:63897738-63901878
		XP_021317796.1	LOC110435990	atherin-like	5:63905292-63905858
		XP_021316683.1	LOC8071963	laccase-21	5:63911487-63913435
	6:52767719:52787719	XP_002446907.1	LOC8083372	expansin-B5	6:52771037-52772256
		XP_021318368.1	LOC8083373	cyclin-P2-1	6:52777082-52777786
		XP_002446909.1	LOC8083374	uncharacterized protein LOC8083374	6:52782508-52784497
	7:17750525:17770525	XP_002444141.1	LOC8073286	uncharacterized protein LOC8073286	7:17760317-17763779
Width	1:6037074:6061177	XP_002463834.2	LOC8086191	uncharacterized protein LOC8086191	1:6036955-6038097
		XP_002466400.1	LOC8083974	serine/threonine-protein kinase SAPK8	1:6046492-6052957
		XP_021307622.1	LOC110432018	transcription factor HHO5-like	1:6061163-6062687
	1:77346060:77366060	XP_002468513.1	LOC8080566	protein PYRICULARIA ORYZAE RESISTANCE 21	1:77355097-77355927
		XP_002465861.1	LOC8080567	tankyrase	1:77360429-77362631
	6:47687863:47707863	XP_021318372.1	LOC8073436	transcription factor MYB16	6:47697987-47700312
		XP_002446621.1	LOC8073437	30S ribosomal protein 3, chloroplastic	6:47701045-47702368
	6:53289174:53309174	XP_021319310.1	LOC8057573	uncharacterized protein LOC8057573	6:53295930-53296754
		XP_002448330.1	LOC8057574	uncharacterized protein LOC8057574	6:53304409-53307048
	6:58139976:58159976	XP_021319463.1	LOC8079577	AP2-like ethylene-responsive transcription factor TOE3 isoform X2	6:58150656-58153520
	7:2061201:2081201	XP_002443786.1	LOC8066119	COP9 signalosome complex subunit 3 isoform X1	7:2065009-2068410
		XP_021321207.1	LOC110437183	uncharacterized protein LOC110437183	7:2076964-2078013
	8:2654486:2674486	XP_021301885.1	LOC8074860	uncharacterized protein LOC8074860	8:2656692-2660856
		XP_021301759.1	LOC110429709	uncharacterized protein LOC110429709	8:2664399-2669007
		XP_002442770.1	LOC8074861	uncharacterized protein LOC8074861	8:2673003-2675182
	9:55101547:55133329	XP_002440093.1	LOC8067532	probable transcriptional regulatory protein At2g25830	9:55101652-55105943
		XP_002441399.1	LOC8082991	dolichyl-diphosphooligosaccharide--protein glycosyltransferase subunit STT3A	9:55106976-55112533
		XP_021303951.1	LOC8067925	probable peptidyl-tRNA hydrolase 2 isoform X3	9:55116801-55122649
		XP_002440094.1	LOC8068943	GATA transcription factor 12	9:55131996-55133587
Length_to_width_Ratio	2:5239556:5260976	XP_021309934.1	LOC8060745	regulatory protein opaque-2 isoform X1	2:5243385-5247183
		XP_021309935.1	LOC8060747	regulatory protein opaque-2	2:5254989-5257843
		XP_021309936.1	LOC110432953	uncharacterized protein LOC110432953	2:5258202-5259353
	2:71923499:71943499	XP_002460937.2	LOC8058368	uncharacterized protein LOC8058368	2:71923062-71923907
		XP_021309119.1	LOC8078971	uncharacterized protein LOC8078971 isoform X1	2:71925364-71928372
		XP_002463098.2	LOC8058369	FBD-associated F-box protein At5g60610	2:71928767-71933354
		XP_002463099.1	LOC8058370	GDSL esterase/lipase At3g26430	2:71935297-71938740
		XP_021310004.1	LOC8058371	threonine--tRNA ligase, chloroplastic/mitochondrial 2	2:71942873-71947513
	6:39919198:39939198	XP_002446330.1	LOC8072006	sec-independent protein translocase protein TATB, chloroplastic	6:39923664-39926716
		XP_002446331.2	LOC8072007	cysteine-rich and transmembrane domain-containing protein A	6:39927922-39929187
		XP_021318622.1	LOC8072008	transport inhibitor response 1-like protein Os04g0395600	6:39938739-39941596
	6:46808908:46828908	XP_002446572.1	LOC8073388	uncharacterized protein LOC8073388 isoform X2	6:46814068-46814867
	7:59797465:59817465	XP_002444553.1	LOC8054827	zinc finger protein 593 homolog	7:59809526-59812638
		XP_021320741.1	LOC110437031	uncharacterized protein LOC110437031	7:59816197-59817198
		XP_021320742.1	LOC110437032	protein MAINTENANCE OF MERISTEMS-like	7:59817159-59817640
Circularity	1:2370714:2390714	XP_002463611.1	LOC8079708	DIMBOA UDP-glucosyltransferase BX8	1:2379346-2380840
		XP_002466177.1	LOC8055691	dolichol-phosphate mannosyltransferase subunit 1	1:2385056-2387454
		XP_002466178.1	LOC8057351	hemK methyltransferase family member 2	1:2389525-2391128
	1:78005661:78025694	XP_002468549.2	LOC8085526	uncharacterized protein LOC8085526	1:78004406-78005994
		XP_002468550.1	LOC8057401	mitochondrial outer membrane protein porin 6	1:78006514-78008817
		XP_002468551.1	LOC8057402	CSC1-like protein At4g35870	1:78011963-78014350
		XP_021301976.1	LOC110429770	protein CHAPERONE-LIKE PROTEIN OF POR1, chloroplastic isoform X2	1:78019691-78022737
		XP_002468552.1	LOC8057403	probable protein phosphatase 2C 28	1:78023841-78026626
	3:5856775:5876775	XP_021311750.1	LOC110433602	uncharacterized protein LOC110433602	3:5859187-5859988
		XP_021311855.1	LOC8060777	hydroxycinnamoyltransferase 4	3:5873320-5875348
	4:6234171:6254171	XP_002451702.2	LOC8079462	uncharacterized protein LOC8079462	4:6235905-6237013
	5:5031030:5051030	XP_002449055.2	LOC8073626	UPF0481 protein At3g47200	5:5037242-5041417
	5:67610275:67630275	XP_021316439.1	LOC8068319	cytochrome P450 716B1	5:67609674-67616966
	10:60569567:60589567	XP_002437619.1	LOC8065017	uncharacterized protein LOC8065017	10:60569120-60570049
		XP_021305718.1	LOC110431235	uncharacterized protein LOC110431235 isoform X2	10:60579364-60581125
Distance_between_IS_ and_CG	1:9022825:9058954	XP_002466572.1	LOC8063379	exportin-2	1:9019373-9023470
		XP_002466573.1	LOC8063380	mitogen-activated protein kinase kinase 9	1:9028491-9029501
		XP_002463995.1	LOC8063381	NADH dehydrogenase [ubiquinone] iron-sulfur protein 1, mitochondrial	1:9033374-9036755
		XP_021309701.1	LOC8062905	uncharacterized protein LOC8062905 isoform X2	1:9037629-9038189
		XP_002463997.1	LOC8062906	uncharacterized protein LOC8062906	1:9039281-9040044
		XP_021309690.1	LOC110432893	dynamin-related protein 1C	1:9040579-9047006
		XP_002466574.1	LOC8062907	threonine dehydratase biosynthetic, chloroplastic	1:9049037-9053272
	2:57485669:57505669	XP_002462310.2	LOC8056195	UDP-glycosyltransferase 90A1	2:57495458-57496930
		XP_002462311.1	LOC8056196	homeobox-leucine zipper protein HOX25	2:57499180-57500985
	3:26427219:26447219	XP_021310937.1	LOC110433353	uncharacterized protein LOC110433353	3:26436465-26437810
	6:60550878:60570878	XP_002448803.1	LOC8076499	NDR1/HIN1-like protein 2	6:60551741-60552361
		XP_021319551.1	LOC110436565	uncharacterized protein LOC110436565 isoform X3	6:60556529-60559090
		XP_002448804.1	LOC8076500	NDR1/HIN1-like protein 1	6:60567808-60568467
	8:60037886:60057886	XP_002442518.2	LOC8084391	putative receptor-like protein kinase At4g00960	8:60045191-60048072
		XP_021301287.1	LOC110429551	uncharacterized protein LOC110429551 isoform X2	8:60048172-60049010
Brightness	2:71868037:71888037	XP_021309807.1	LOC110432917	cell wall protein IFF6-like	2:71871289-71872644
		XP_021310310.1	LOC8078966	histone H3.3	2:71880114-71880910
		XP_002460933.1	LOC8058365	putative MO25-like protein At5g47540	2:71884968-71889974
	3:65835810:65858654	XP_021311363.1	LOC8085390	probable leucine-rich repeat receptor-like protein kinase At5g49770	3:65840443-65845617
		XP_021311998.1	LOC110433754	probable leucine-rich repeat receptor-like protein kinase At5g49770	3:65855189-65855599
		XP_002456532.1	LOC8055293	L-ascorbate oxidase homolog	3:65856877-65858774
	6:15369645:15389645	XP_002447605.1	LOC8086462	probable carbohydrate esterase At4g34215	6:15377928-15386172
	6:57602710:57622710	XP_021319332.1	LOC8081623	uncharacterized protein LOC8081623	6:57591837-57604657
		XP_021319637.1	LOC8068451	uncharacterized protein LOC8068451	6:57604668-57606561
	7:13814675:13834675	XP_021320809.1	LOC110437044	putative F-box/LRR-repeat protein 9	7:13824725-13829146
		XP_021320807.1	LOC110437043	uncharacterized protein LOC110437043 isoform X2	7:13826265-13827467
		XP_021320810.1	LOC110437045	uncharacterized protein LOC110437045	7:13830679-13831385
	8:3038619:3058619	XP_002441819.1	LOC8066953	protein trichome birefringence-like 11	8:3049205-3052530
		XP_021301361.1	LOC8074872	uncharacterized protein LOC8074872	8:3055697-3059139
	10:18554130:18574130	XP_002438334.2	LOC8078263	protein LE25	10:18564106-18564477
